# Supplementary material for: Integrating Multimodal Supportive Care in Digestive Oncology: Nutritional Frailty Score and Lessons from ParcoursDig and PrePOP studies
Source: Research Square preprint supplement (doi:10.21203/rs.3.rs-8028101/v1), 2025-12-10
Supplement: Supplementary file 2 [file ff28824f767eb7d4b07ba611.pdf]

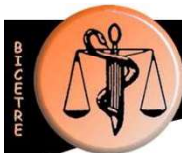

Bureau :

Présidente : Anne-Marie TABURET  
Vice Présidente : Françoise BOISSY  
Trésorier : Claude COTTET  
Secrétaire : François HIRSCH

Secrétariat : Madame Brigitte PILATE-DAUSSY  
(Portail des Champs – Secteur Bleu – Porte 74 bis – RDC)  
e-mail : [cpp.idf.7-bicetre@wanadoo.fr](mailto:cpp.idf.7-bicetre@wanadoo.fr)  
site internet : <http://cpp.idf.7.bicetre.free.fr>  
Téléphone : 01 45 21 28 46 – Télécopie : 01 45 21 21 45  
Portable : 06 21 25 49 30

Premier Collège

Michel BOTTLAENDER Médecin investigateur (T)  
François HIRSCH chercheur (T)  
Paul de BOISSIEU Médecin de santé publique (T)  
Gian Paolo DE FILIPPO pédiatre (T)  
Renaud de BEAUREPAIRE Neurobiologiste (S)  
Katia BOURDIC Technicienne d'étude clinique (S)  
Catherine HILL Epidémiologiste (S)  
Guillaume COINDARD Médecin généraliste (T)  
Anne-Marie TABURET Pharmacien hospitalier (T)  
Danièle BLONDELON Pharmacien hospitalier (S)

Deuxième Collège

Pascal CASARANG Ethique (T)  
Mireille COSQUER Psychologue (T)  
Françoise BOISSY Juriste (T)  
Valérie-Ann LAFOY Juriste (T)  
Juliette GAUTIER Juriste (S)  
Annie LABBE Représentant des associations (T)  
Claude COTTET Représentant des associations (T)  
Georges MARDUEL Représentant des associations (S)

Madame LAZAREFF  
CHU d'Angers  
Direction des Affaires Médicales, de la  
Recherche et de l'Innovation  
4 rue Larrey  
49933 ANGERS Cedex 09

Kremlin Bicêtre, le 17 juin 2020

**Protocole N° 20-024**  
**N° : IC 2020-01**  
**N°ID-RCB : 2020-A00230-39**  
**(N° à rappeler dans toute correspondance)**

Madame,

Le C.P.P. IDF VII a instruit en séance plénière le 11 mars 2020 votre protocole intitulé :

**« ETUDE PROSPECTIVE D'ÉVALUATION D'UN PROGRAMME DE REPERAGE DES BESOINS EN SOINS DE SUPPORT ET PRISE EN CHARGE MULTIDISCIPLINAIRE PRECOCE EN ONCOLOGIE DIGESTIVE - ETUDE DISSPO PARCOURS DIG »**

dont l'investigateur principal est le Docteur Cindy NEUZILLET - 35 rue Dailly 92210 Saint Cloud

et le promoteur est INSTITUT CURIE. 26, rue d'Ulm – 75005 PARIS Tél. : 01 44 32 40 00

Dossier soumis en catégorie 2

**Documents examinés :**

|           |                                                                                                                                                  |
|-----------|--------------------------------------------------------------------------------------------------------------------------------------------------|
| <u>1</u>  | <a href="#">Formulaire de demande d'avis au CPP pour une recherche mentionnée au 1 ou au 2° de l'article L. 1121-1 du CSP, complété et signé</a> |
| <u>2</u>  | <a href="#">Courrier d'accompagnement CPP signé du 31/01/2020</a>                                                                                |
| <u>3</u>  | <a href="#">Document Additionnel signé du 28/01/2020</a>                                                                                         |
| <u>4</u>  | <a href="#">Attestation d'assurance du 29/01/2020</a>                                                                                            |
| <u>5</u>  | <a href="#">Synopsis en français Version 1.0 du 28 janvier 2020</a>                                                                              |
| <u>6</u>  | <a href="#">Synopsis en anglais Version 1.0 du 28 janvier 2020</a>                                                                               |
| <u>7</u>  | <a href="#">Protocole Version 1.0 du 28 janvier 2020</a>                                                                                         |
| <u>8</u>  | <a href="#">Note d'information Patient et Formulaire de consentement Version 1.0 du 28 janvier 2020</a>                                          |
| <u>9</u>  | <a href="#">Liste des investigateurs Version 1.0 du 28 janvier 2020</a>                                                                          |
| <u>10</u> | <a href="#">CV du Dr Cindy NEUZILLET daté du 27/03/2019</a>                                                                                      |
| <u>11</u> | <a href="#">Certificat des Bonnes Pratiques Cliniques du Dr Cindy NEUZILLET daté du 13/05/2018</a>                                               |
| <u>12</u> | <a href="#">Déclaration de conformité à la méthodologie de référence MR001 du 22/10/2015</a>                                                     |
| <u>13</u> | <a href="#">Justification des moyens signée du 28/01/2020</a>                                                                                    |
| <u>14</u> | <a href="#">Questionnaire EORTC-QLQ-C30</a>                                                                                                      |
| <u>15</u> | <a href="#">Echelles visuelles analogiques (EVA de la fatigue, de la douleur, des ingesta, de satisfaction)</a>                                  |
| <u>16</u> | <a href="#">Questionnaires GPAQ et IPAQ</a>                                                                                                      |
| <u>17</u> | <a href="#">Questionnaires G8, G-CODE et MNA</a>                                                                                                 |

**Membres présents lors de la délibération de votre protocole**

Premier Collège :

- Recherche biomédicale : Monsieur P. de BOISSIEU, épidémiologiste (T), Monsieur M. BOTTLAENDER (T), Monsieur F. HIRSCH (T) et Madame C. HILL (S)

- Pharmacien : Madame A. M. TABURET (T)

Deuxième collège :

- Juriste : Madame F. BOISSY (T) et Madame J. GAUTIER (S)

- Associations agréées : Monsieur C. COTTET (T) et Monsieur G. MARDUEL (S)

Et a posé des questions en date du 16 mars 2020

Le CPP s'est réuni le 10 juin 2020 (conférence téléphonique) pour examiner les réponses du 7 avril 2020

**Documents examinés :**

- Liste des documents transmis au CPP en format Word du 07/04/2020
- Courrier d'accompagnement des réponses au CPP du 07/04/2020
- Réponses aux questions CPP du 07/04/2020
- Protocole de l'étude Version 1.1 du 07/04/2020 (avec les modifications apparentes)
- Résumé en français Version 1.1 du 07/04/2020 (avec les modifications apparentes)
- Résumé en anglais Version 1.1 du 07/04/2020 (avec les modifications apparentes)
- Note d'information et formulaire de consentement Version 1.1 du 07/04/2020 (avec les modifications apparentes)

### **Membres présents lors de la délibération de votre protocole**

Premier Collège :

- Recherche biomédicale : Monsieur M. BOTTLAENDER (T), Monsieur F. HIRSCH (T), Madame C. HILL (S), Monsieur G. P. de FILIPPO, pédiatre (T) et Madame K. BOURDIC (S)
- Pharmacien : Madame A. M. TABURET (T) et Madame D BLONDELON (S)

Deuxième collège :

- Personne qualifiée en éthique : Monsieur P. CASOURANG (T)
- Psychologue : Madame M. COSQUER (T)
- Juriste : Madame F. BOISSY (T) et Madame J. GAUTIER (S)
- Associations agréées : Madame A. LABBE (T) et Monsieur C. COTTET (T) et Monsieur G. MARDUEL (S)

Le Comité :

- considérant l'intérêt du projet de recherche
- le respect d'une méthodologie adaptée à la question posée
- considérant le respect d'un consentement libre et éclairé formulé au regard d'une note d'information adaptée
- considérant la balance bénéfice risque pour le patient positive

a adopté la délibération suivante :

**AVIS FAVORABLE SANS RESTRICTION**



Anne-Marie TABURET  
Présidente de la séance du 10 juin 2020
